# Supplementary material for: Polymorphism and “reverse” spin transition in the spin crossover system [Co(4-terpyridone)2](CF3SO3)2·1H2O
Source: Royal Society of Chemistry journal article supplement (doi:10.1039/b905674b), 2009-01-01
Supplement: b905674b.pdf [file b905674b.pdf]

## Electronic Supplementary Information

### Polymorphism and “reverse” spin transition in the spin crossover system

#### [Co(4-terpyridone)<sub>2</sub>](CF<sub>3</sub>SO<sub>3</sub>)<sub>2</sub>·1H<sub>2</sub>O

G. Agustí, C. Bartual, V. Martínez, F. J. Muñoz-Lara, A. B. Gaspar, M. C. Muñoz, J. A. Real

**Table S1.** Crystal data for **1** at 293 K and 120 K.

|                            | <b>1</b>                                                                                       |              |
|----------------------------|------------------------------------------------------------------------------------------------|--------------|
|                            | <b>293 K</b>                                                                                   | <b>120 K</b> |
| Empirical formula          | C <sub>32</sub> H <sub>24</sub> N <sub>6</sub> O <sub>9</sub> S <sub>2</sub> F <sub>6</sub> Co |              |
| <i>Mr</i>                  | 873.62                                                                                         |              |
| Crystal system             | triclinic                                                                                      |              |
| Space group                | P-1                                                                                            |              |
| <i>a</i> (Å)               | 9.1020(5)                                                                                      | 9.0803(2)    |
| <i>b</i> (Å)               | 9.2410(5)                                                                                      | 9.1039(3)    |
| <i>c</i> (Å)               | 21.3860(18)                                                                                    | 21.1499(7)   |
| $\alpha$ (°)               | 94.896(2)                                                                                      | 94.899(3)    |
| $\beta$ (°)                | 94.487(2)                                                                                      | 94.810(2)    |
| $\gamma$ (°)               | 90.730(6)                                                                                      | 91.322(2)    |
| <i>V</i> (Å <sup>3</sup> ) | 1786.4(2)                                                                                      | 1735.05(9)   |

Selected bond lengths [Å] and angles [°] for **1** at 120 K.

|              |           |
|--------------|-----------|
| Co(1)-N(1)   | 2.099(9)  |
| Co(1)-N(2)   | 1.922(9)  |
| Co(1)-N(3)   | 2.097(12) |
| Co(1)-N(4)   | 2.074(11) |
| Co(1)-N(5)   | 1.909(10) |
| Co(1)-N(6)   | 2.079(10) |
|              |           |
| N(1)-Co-N(2) | 79.1(4)   |
| N(1)-Co-N(3) | 158.3(4)  |
| N(1)-Co-N(4) | 93.7(4)   |
| N(1)-Co-N(5) | 100.8(4)  |
| N(1)-Co-N(6) | 89.4(4)   |
| N(2)-Co-N(3) | 79.2(4)   |
| N(2)-Co-N(4) | 101.1(4)  |
| N(2)-Co-N(5) | 179.2(4)  |
| N(2)-Co-N(6) | 99.2(4)   |
| N(3)-Co-N(4) | 91.5(4)   |
| N(3)-Co-N(5) | 100.9(4)  |
| N(3)-Co-N(6) | 93.0(4)   |
| N(4)-Co-N(5) | 79.7(4)   |
| N(4)-Co-N(6) | 159.7(4)  |
| N(5)-Co-N(6) | 79.9(4)   |

**Table S2.** Crystal data for **2** at 293 K, 180 K and 120 K.

|                            | <b>2</b>                                                                                       |              |              |
|----------------------------|------------------------------------------------------------------------------------------------|--------------|--------------|
|                            | <b>293 K</b>                                                                                   | <b>180 K</b> | <b>120 K</b> |
| Empirical formula          | C <sub>32</sub> H <sub>24</sub> N <sub>6</sub> O <sub>9</sub> F <sub>6</sub> S <sub>2</sub> Co |              |              |
| <i>Mr</i>                  | 873.62                                                                                         |              |              |
| Crystal system             | triclinic                                                                                      |              |              |
| Space group                | P-1                                                                                            |              |              |
| <i>a</i> (Å)               | 9.5700(4)                                                                                      | 18.6610(6)   | 9.2500(4)    |
| <i>b</i> (Å)               | 14.3510(9)                                                                                     | 14.2520(4)   | 14.2320(7)   |
| <i>c</i> (Å)               | 14.9540(8)                                                                                     | 14.8710(5)   | 14.8280(10)  |
| $\alpha$                   | 75.456(4)                                                                                      | 75.246(2)    | 75.209(2)    |
| $\beta$ (°)                | 71.982(4)                                                                                      | 72.662(1)    | 72.982(3)    |
| $\gamma$                   | 72.274(2)                                                                                      | 72.439(1)    | 72.315(2)    |
| <i>V</i> (Å <sup>3</sup> ) | 1832.19(17)                                                                                    | 3539.92(19)  | 1748.45(16)  |
